# Supplementary material
Source: Elsevier journal article supplement (https://www.sciencedirect.com/science/article/pii/S0121812319300623)
Supplement: mmc1 [file S0121812319300623:mmc1.pdf]

# INVENTARIO DE HABILIDAD DE CUIDADO<sup>1</sup>

NOMBRE: \_\_\_\_\_

No.    

FECHA: \_\_\_\_\_

**Instructivo:** lea cada una de las siguientes afirmaciones y marque la opción que mejor refleje sus pensamientos al respecto. Utilizando para expresar su nivel de acuerdo o desacuerdo la escala de 1 a 7 al lado de cada afirmación. Señale con la X, el número correspondiente a su opinión. No hay respuestas correctas o erradas. Por favor responda todas las preguntas. Ejemplo: en la afirmación "la vida es bella". Usted considera que lo es pero no del todo, por eso decide marcar 5, lo cual hará así:

En absoluto desacuerdo

|   |   |   |   |                                     |   |   |
|---|---|---|---|-------------------------------------|---|---|
| 1 | 2 | 3 | 4 | <input checked="" type="checkbox"/> | 6 | 7 |
|---|---|---|---|-------------------------------------|---|---|

Totalmente de acuerdo

| NO. | AFIRMACIONES                                                                              | CALIFICACIÓN |   |   |   |   |   |   |
|-----|-------------------------------------------------------------------------------------------|--------------|---|---|---|---|---|---|
|     |                                                                                           | 1            | 2 | 3 | 4 | 5 | 6 | 7 |
| 1   | Aprender me toma tiempo                                                                   |              |   |   |   |   |   |   |
| 2   | Mi vida está llena de oportunidades                                                       |              |   |   |   |   |   |   |
| 3   | Usualmente digo lo que quiero decir a otros                                               |              |   |   |   |   |   |   |
| 4   | Puedo hacer mucho por alguien indefenso                                                   |              |   |   |   |   |   |   |
| 5   | Veó la necesidad de cambio en mí mismo                                                    |              |   |   |   |   |   |   |
| 6   | Tengo la capacidad de que me gusten las personas así yo no les guste a ellas              |              |   |   |   |   |   |   |
| 7   | Entiendo a las personas fácilmente                                                        |              |   |   |   |   |   |   |
| 8   | Me falta ver más cosas en este mundo para aprender cada día más                           |              |   |   |   |   |   |   |
| 9   | Saco tiempo para llegar a conocer a otras personas                                        |              |   |   |   |   |   |   |
| 10  | Me gusta que me hagan participe en diferentes asuntos                                     |              |   |   |   |   |   |   |
| 11  | Hay mucho que puedo hacer para hacer la vida mejor                                        |              |   |   |   |   |   |   |
| 12  | Me siento tranquilo aunque otra persona depende de mí                                     |              |   |   |   |   |   |   |
| 13  | Me gusta desviarme de mis cosas si es para ayudar a otros                                 |              |   |   |   |   |   |   |
| 14  | Soy capaz de demostrar mis sentimientos al tratar a otras personas                        |              |   |   |   |   |   |   |
| 15  | Es tan importante lo que hago como la forma de comunicarlo                                |              |   |   |   |   |   |   |
| 16  | Puedo entender cómo se sienten las personas así no haya pasado por experiencias similares |              |   |   |   |   |   |   |
| 17  | Admiro a las personas que son calmadas, compuestas y pacientes.                           |              |   |   |   |   |   |   |
| 18  | Considero importante aceptar y respetar las actitudes y sentimientos de otros             |              |   |   |   |   |   |   |
| 19  | La gente puede contar conmigo para hacer lo que me comprometí                             |              |   |   |   |   |   |   |
| 20  | Tengo espacio para mejorar                                                                |              |   |   |   |   |   |   |
| 21  | Considero que ser buen amigo es estar pendientes cada uno del otro                        |              |   |   |   |   |   |   |
| 22  | Encuentro una razón de ser en las situaciones de cuidado                                  |              |   |   |   |   |   |   |
| 23  | Puedo darles libertad a aquellos a quienes cuido sin temores de lo que pueda sucederles   |              |   |   |   |   |   |   |
| 24  | Me gusta alentar a las personas                                                           |              |   |   |   |   |   |   |
| 25  | Me gusta hacer compromisos más allá del presente                                          |              |   |   |   |   |   |   |
| 26  | De verdad me gusta como soy                                                               |              |   |   |   |   |   |   |
| 27  | Veó fortalezas y debilidades en cada individuo                                            |              |   |   |   |   |   |   |
| 28  | Usualmente enfrento las nuevas experiencias con valor                                     |              |   |   |   |   |   |   |
| 29  | Me siento tranquilo al abrirme y permitir que otros vean quién soy                        |              |   |   |   |   |   |   |
| 30  | Acepto a las personas tal como son                                                        |              |   |   |   |   |   |   |
| 31  | Cuando cuido a alguien soy capaz de manifestar mis sentimientos                           |              |   |   |   |   |   |   |
| 32  | Me gusta que me pidan ayuda                                                               |              |   |   |   |   |   |   |
| 33  | Puedo expresar mis sentimientos a las personas de una forma cálida y cuidadosa            |              |   |   |   |   |   |   |
| 34  | Me gusta interactuar con las personas                                                     |              |   |   |   |   |   |   |
| 35  | Me veo como una persona sincera en mis relaciones con otros                               |              |   |   |   |   |   |   |
| 36  | Considero que las personas deben tener espacio (lugar, privacidad) para pensar y sentir   |              |   |   |   |   |   |   |
| 37  | Las personas se pueden acercar a mí en cualquier momento                                  |              |   |   |   |   |   |   |

FUENTE: Nkongho N. The Caring Ability Inventory. In Ora L. Strickland and Carolyn F. Waltz.

Measurement of Nursing Outcomes: Self Care and Copin. New York. Springer Publishing Company, Part III. 1990; (3 y 4) pp. 3- 16.

<sup>1</sup> Con revisión de traducción del idioma original, retraducción al español y afinación semántica realizada por el Grupo de Cuidado al Paciente Crónico. Febrero 25 2013 Universidad Nacional de Colombia
